# Supplementary material for: Dynamic equilibrium between cyclic oligomers. Thermodynamic and structural characterization of a square and a triangle
Source: Royal Society of Chemistry journal article supplement (doi:10.1039/b604928a), 2006-01-01
Supplement: b604928a.pdf [file b604928a.pdf]

**Dynamic equilibrium between cyclic oligomers. Thermodynamic and structural characterization of a square and a triangle**

F. Albert Cotton,\* Carlos A. Murillo\* and Rongmin Yu

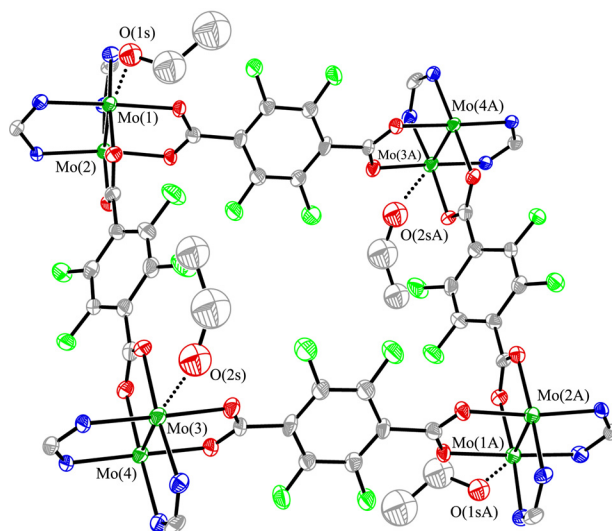

**Figure S1.** Thermal ellipsoids plot for the core of molecular square **1** and the ethanol molecules close to the [Mo<sub>2</sub>] units. Displacement ellipsoids are drawn at the 40% probability level. The distance of Mo(1)···O(1S) is 2.53(1) Å and that of Mo(3)···O(2S) is 2.58(4) Å. Hydrogen atoms, anisyl groups and axial and the other interstitial molecules are omitted for clarity.

---

\* Department of Chemistry and Laboratory for Molecular Structure and Bonding, P. O. Box 3012, Texas A&M University, College Station, Texas 77842-3012. E-mail: [cotton@tamu.edu](mailto:cotton@tamu.edu) (F.A.C.), [murillo@tamu.edu](mailto:murillo@tamu.edu) (C.A.M.)

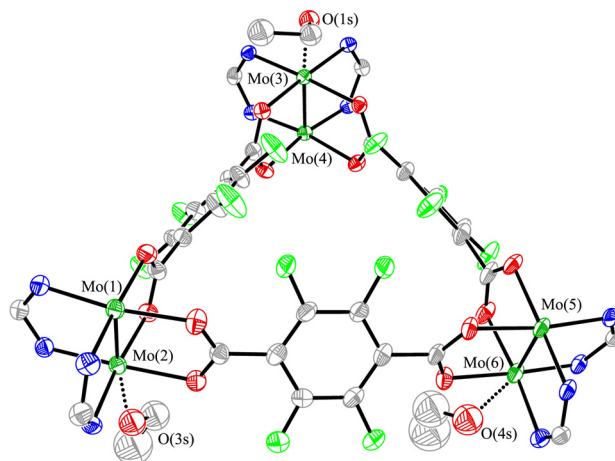

**Figure S2.** Thermal ellipsoids plot for the core of molecular triangle **2** and the ethanol molecules close to the  $[\text{Mo}_2]$  units. Displacement ellipsoids are drawn at the 40% probability level. The distances of  $\text{Mo}(2)\cdots\text{O}(3\text{S})$ ,  $\text{Mo}(3)\cdots\text{O}(1\text{S})$  and  $\text{Mo}(6)\cdots\text{O}(4\text{S})$  are 2.52(1), 2.558(6) and 2.53(2) Å, respectively. Hydrogen atoms, anisyl groups and axial and the other interstitial molecules are omitted for clarity.
